# Supplementary material for: DNA methylation and histone modifications regulate SOX11 expression in lymphoid and solid cancer cells
Source: Springer Nature journal article supplement (doi:10.1186/s12885-015-1208-y), 2015-04-11
Supplement: MOESM1 [file 9744204]

### Additional file 4 – Detailed description of cell lines, provider and culture media

| Malignancy    | Cell-line  | Provider | Medium              | FCS  | L-glutamine | Other                                                  |
|---------------|------------|----------|---------------------|------|-------------|--------------------------------------------------------|
| MCL           | REC-1      | DSMZ     | RPMI 1640           | 10 % | 2 mM        |                                                        |
| MCL           | GRANTA-519 | DSMZ     | RPMI 1640           | 10 % | 2 mM        |                                                        |
| MCL           | JEKO-1     | DSMZ     | RPMI 1640           | 20 % | 2 mM        |                                                        |
| MCL           | SP53       | 1        | RPMI 1640           | 10 % | 2 mM        |                                                        |
| MCL           | MINO       | DSMZ     | RPMI 1640           | 20 % | 2 mM        |                                                        |
| MCL           | Z138       | 2        | RPMI 1640           | 10 % | 2 mM        |                                                        |
| MCL           | HBL-2      | N.A      | RPMI 1640           | 10 % | 2 mM        |                                                        |
| MCL           | JVM-2      | DSMZ     | RPMI 1640           | 10 % | 2 mM        |                                                        |
| MCL           | UPN-2      | N.A      | RPMI 1640           | 10 % | 2 mM        |                                                        |
| FL            | DOHH-2     | DSMZ     | RPMI 1640           | 10 % | 2 mM        |                                                        |
| FL            | RL         | DSMZ     | RPMI 1640           | 10 % | 2 mM        |                                                        |
| FL            | SC-1       | DSMZ     | RPMI 1640           | 10 % | 2 mM        |                                                        |
| DLBCL         | WSU-NHL    | DSMZ     | RPMI 1640           | 10 % | 2 mM        |                                                        |
| DLBCL         | SU-DHL-8   | 3        | RPMI 1640           | 10 % | 2 mM        |                                                        |
| BL            | BJAB       | N.A      | RPMI 1640           | 10 % | 2 mM        |                                                        |
| BL            | RAMOS      | DSMZ     | RPMI 1640           | 10 % | 2 mM        |                                                        |
| BL            | RAJI       | DSMZ     | RPMI 1640           | 10 % | 2 mM        |                                                        |
| BL            | DAUDI      | DSMZ     | RPMI 1640           | 10 % | 2 mM        |                                                        |
| Ovarian       | ES-2       | 4        | McCoy's 5A          | 10 % | 2 mM        |                                                        |
| Ovarian       | TOV-112D   | 4        | DMEM high glucose   | 15 % | 2 mM        |                                                        |
| Ovarian       | OVCAR-3    | ATCC     | RPMI 1640           | 20 % | 2 mM        |                                                        |
| Ovarian       | A2780      | 5        | RPMI 1640           | 10 % | 2 mM        |                                                        |
| Ovarian       | A2780-CP7  | 5        | RPMI 1640           | 10 % | 2 mM        |                                                        |
| Breast cancer | MCF7       | ATCC     | RPMI 1640           | 10 % | 2 mM        |                                                        |
| Breast cancer | JIMT-1     | 6        | RPMI 1640           | 10 % | 2 mM        |                                                        |
| Breast cancer | SK-BR-3    | ATCC     | RPMI 1640           | 10 % | 2 mM        |                                                        |
| Breast cancer | PMC-42     | 6        | RPMI 1640           | 10 % | 2 mM        |                                                        |
| Breast cancer | T-47D      | ATCC     | RPMI 1640           | 10 % | 2 mM        |                                                        |
| Breast cancer | MDA-MB-231 | 6        | RPMI 1640           | 10 % | 2 mM        |                                                        |
| Breast cancer | L56Br-C1   | 6        | RPMI 1640           | 10 % | 2 mM        | 0.01 mg/ml insulin                                     |
| Breast cancer | BT-474     | 7        | RPMI 1640           | 10 % | 2 mM        |                                                        |
| Breast cancer | BT-549     | 7        | RPMI 1640           | 10 % | 2 mM        |                                                        |
| Lung cancer   | DMS-114    | 8        | Waymouth's MB 752/1 | 10 % | 2 mM        |                                                        |
| Lung cancer   | NCI-H1299  | 8        | RPMI 1640           | 10 % | 2 mM        |                                                        |
| Lung cancer   | A549       | 8        | Ham's F12 Kaighn's  | 10 % | 2 mM        |                                                        |
| Glioma        | HS683      | 9        | DMEM high glucose   | 10 % | 4 mM        | 1 mM sodium pyruvate                                   |
| Glioma        | LN18       | 10       | DMEM high glucose   | 10 % | 2 mM        |                                                        |
| Glioma        | U-87 MG    | 10       | DMEM high glucose   | 10 % | 2 mM        |                                                        |
| Glioma        | GMB-LU60   | 11       | RPMI 1640           | 10 % | 2 mM        | 1 mM Sodium Pyruvate, 10 mM HEPES, 50 ug/ml gentamicin |
| Glioma        | GMB-LU93   | 11       | RPMI 1640           | 10 % | 2 mM        | 1 mM Sodium Pyruvate, 10 mM HEPES, 50 ug/ml gentamicin |
| Neuroblastoma | KCN-69n    | 12       | MEM/EBSS            | 10 % | 2 mM        |                                                        |
| Neuroblastoma | SK-N-SH    | 12       | MEM/EBSS            | 10 % | 2 mM        |                                                        |

Cell-lines were kindly provided by:

1. Mats Ehinger, Dept. of Pathology, University Hospital Lund, Sweden
2. Martin Dyer, University of Leicester, Leicester, England
3. Kristina Drott, Division of Hematology and Transfusion Medicine, Lund University, Sweden
4. Gabriella Honeth, Department of Cell and Molecular Biology, Section for Tumor Biology, Lund University, Sweden

5. Donal J Brennan, UCD School of Biomolecular and Biomedical Science, UCD Conway Institute, University College, Dublin, Ireland
6. Cecilia Hegardt, Department of oncology, Lund University, Sweden
7. Sofia Gruvberger Saal, Department of Oncology, Lund University, Sweden
8. BioInvent International AB, Lund, Sweden
9. Ulrike Nuber, Department of Laboratory Medicine, Lund Strategic Research Center for Stem Cell Biology and Cell Therapy, Lund University, Sweden
10. Mattias Belting, Department of clinical Science, Section of oncology, Lund University, Sweden
11. Anna Darabi, Department of Clinical Sciences, Division of Neurosurgery, Lund University, Sweden
12. Sven Pålman, Department of Laboratory Medicine, Lund University, Sweden
